# Supplementary material for: Treatment of Cesarean Scar and Cervical Pregnancies Using the Ovum Aspiration Set for Intrachorial Methotrexate Injection as a Conservative, Fertility-Preserving Procedure
Source: MDPI journal article supplement (doi:10.3390/medicina59040761), 2023-04-14
Supplement: s1 [file s1]

**Table S1:** Factors related with the success/failure of MTX (IC/IM) injection (logistic regression)

| Variable                                             | Success*<br>Mean (range)<br>N=8 | Failure**<br>Mean (range)<br>N=3 | Odds Ratio<br>(95% Confidence interval) | p-value |
|------------------------------------------------------|---------------------------------|----------------------------------|-----------------------------------------|---------|
| <b>Gestation type</b>                                |                                 |                                  |                                         | 0.90    |
| CSP                                                  | 3 (75%)                         | 1 (25%)                          |                                         |         |
| CP                                                   | 5 (71.4%)                       | 2 (28.6%)                        | 0.83 (0.05 – 13.63)                     |         |
| <b>Maternal age (median)</b>                         |                                 |                                  |                                         | 0.93    |
| ≤ 34 years                                           | 3 (50%)                         | 3 (50%)                          |                                         |         |
| > 34 years                                           | 5 (100%)                        | 0                                | >999.9 (<0.001 – >999.9)                |         |
| <b>Gravidity</b>                                     |                                 |                                  |                                         | 0.62    |
| ≤ 2                                                  | 4 (80%)                         | 1 (20%)                          |                                         |         |
| > 2                                                  | 4 (66.7%)                       | 2 (33.3%)                        | 2.00 (0.13 – 31.98)                     |         |
| <b>Parity</b>                                        |                                 |                                  |                                         | 0.78    |
| Nulliparous                                          | 2 (66.7%)                       | 1 (33.3%)                        |                                         |         |
| Multiparous                                          | 6 (75%)                         | 2 (25%)                          | 0.67 (0.04 – 11.94)                     |         |
| <b>Duration since last pregnancy (years)</b>         |                                 |                                  |                                         | 0.90    |
| ≤ 2                                                  | 5 (71.4%)                       | 2 (28.6%)                        |                                         |         |
| > 2                                                  | 3 (75%)                         | 1 (25%)                          | 0.83 (0.05 – 13.63)                     |         |
| <b>Gestational age at diagnosis (median)</b>         |                                 |                                  |                                         | 0.62    |
| ≤ 6 weeks                                            | 4 (66.7%)                       | 2 (33.3%)                        |                                         |         |
| > 6 weeks                                            | 4 (80%)                         | 1 (20%)                          | 0.50 (0.031 – 7.99)                     |         |
| <b>Days between diagnosis and therapy Initiation</b> |                                 |                                  |                                         | 0.40    |
| ≤ 3 days                                             | 5 (83.3%)                       | 1 (16.7%)                        |                                         |         |
| > 3 days                                             | 3 (60%)                         | 2 (40%)                          | 3.33 – 0.20 – 54.53                     |         |
| <b>Cycles of IM MTX</b>                              |                                 |                                  |                                         | 0.90    |
| ≤ 1                                                  | 3 (75%)                         | 1 (25%)                          |                                         |         |
| > 1                                                  | 5 (62.5%)                       | 2 (66.7%)                        | 1.2 (0.007 – 19.63)                     |         |
| <b>β-hCG (at diagnosis, mIU/ml)</b>                  |                                 |                                  |                                         | 0.62    |
| ≤ 38 820 (median)                                    | 4 (66.7%)                       | 2 (33.3%)                        |                                         |         |
| > 38 820                                             | 4 (80%)                         | 1 (20%)                          | 0.50 (0.031 – 7.99)                     |         |
| <b>β-hCG (at therapy initiation, mIU/ml)</b>         |                                 |                                  |                                         | 0.62    |

|                                                                            |           |           |                            |
|----------------------------------------------------------------------------|-----------|-----------|----------------------------|
| ≤ 40 661                                                                   | 5 (83.3%) | 1 (16.7%) |                            |
| > 40 661                                                                   | 3 (60%)   | 2 (40%)   | 2.00 (0.13 – 31.98)        |
| <b>Localization of gestational sac according to modified Delphi method</b> |           |           | 0.81                       |
| Not crossing UL/SL                                                         | 2 (66.7%) | 1 (33.3%) |                            |
| Crossing UL                                                                | 1 (100%)  | 0 (0%)    |                            |
| Crossing SL                                                                | 2 (66.7%) | 1 (66.7%) | 1.50 (0.06 – 40.63)        |
| <b>History of miscarriage</b>                                              |           |           | 0.93                       |
| No                                                                         | 5 (100%)  | 0 (0%)    |                            |
| Yes                                                                        | 3 (50%)   | 3 (50%)   | >999.99 /<0.001 – >999.99) |

(Abbreviations: CSP=cesarean scar pregnancy, CP=cervical pregnancy, HCG=human chorionic gonadotropin, IM=intramuscular, MTX=methotrexate, SL=serosal line, UL=uterine line)
